# Supplementary material
Source: PubMed Central journal article supplement (PMC524220)

CD132  
p=0.5

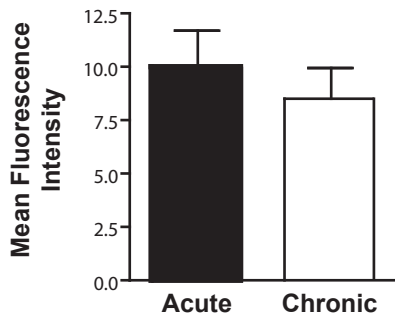

CD127  
p=0.01

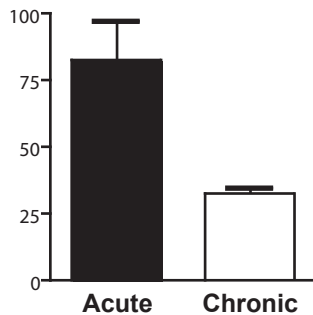

CD122  
p<0.01

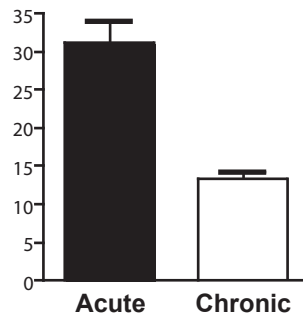

IL-15Ra  
p=0.6

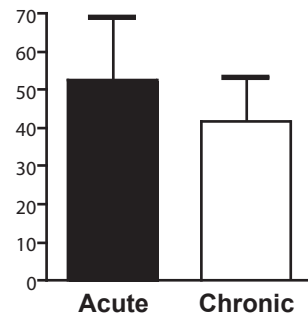

pSTAT5  
p=0.02

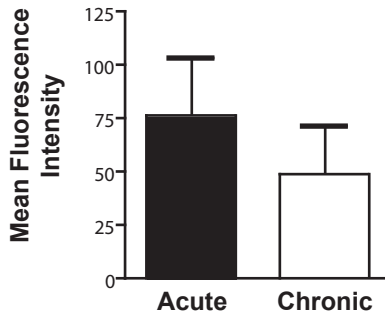

Bcl-2  
p=0.03

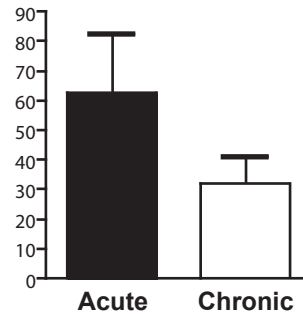

Supplement: pnas_101_45_16004__1.pdf [file pnas_101_45_16004__1.pdf]
